# Supplementary material for: N-Acetylglucosamine biofunctionalized CdSeTe quantum dots as fluorescence probe for specific protein recognition
Source: Royal Society of Chemistry journal article supplement (doi:10.1039/c2an36434d), 2012-11-12
Supplement: c2an36434d.pdf [file c2an36434d.pdf]

## Supplementary Information

### N-acetylglucosamine Biofunctionalized CdSeTe quantum dots as fluorescence probe for specific protein recognition.

Fang-Fang Cheng, Guo-Xi Liang, Yuan-Yuan Shen, Rohit Kumar Rana, and Jun-Jie Zhu\*

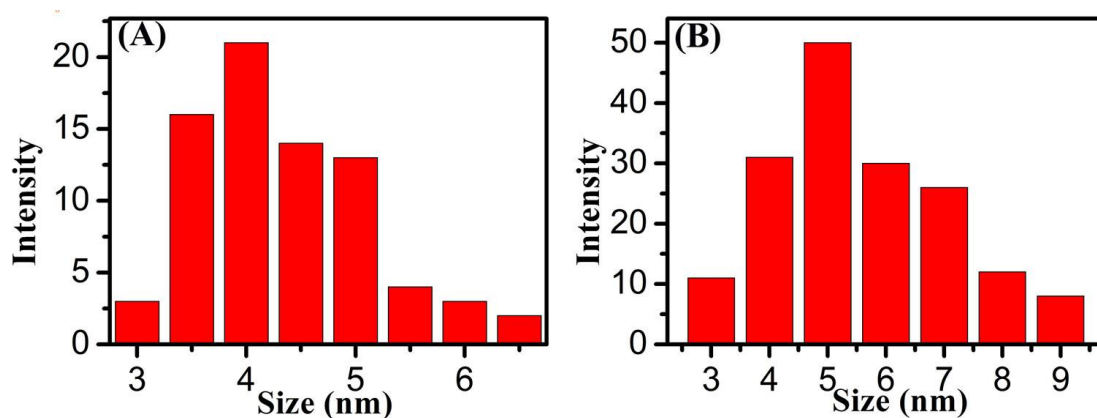

Figure S1. Size distribution of L-cysteine-coated QDs (A) and QD-Con A-GlcNAc (B) by dynamic light scattering measurements

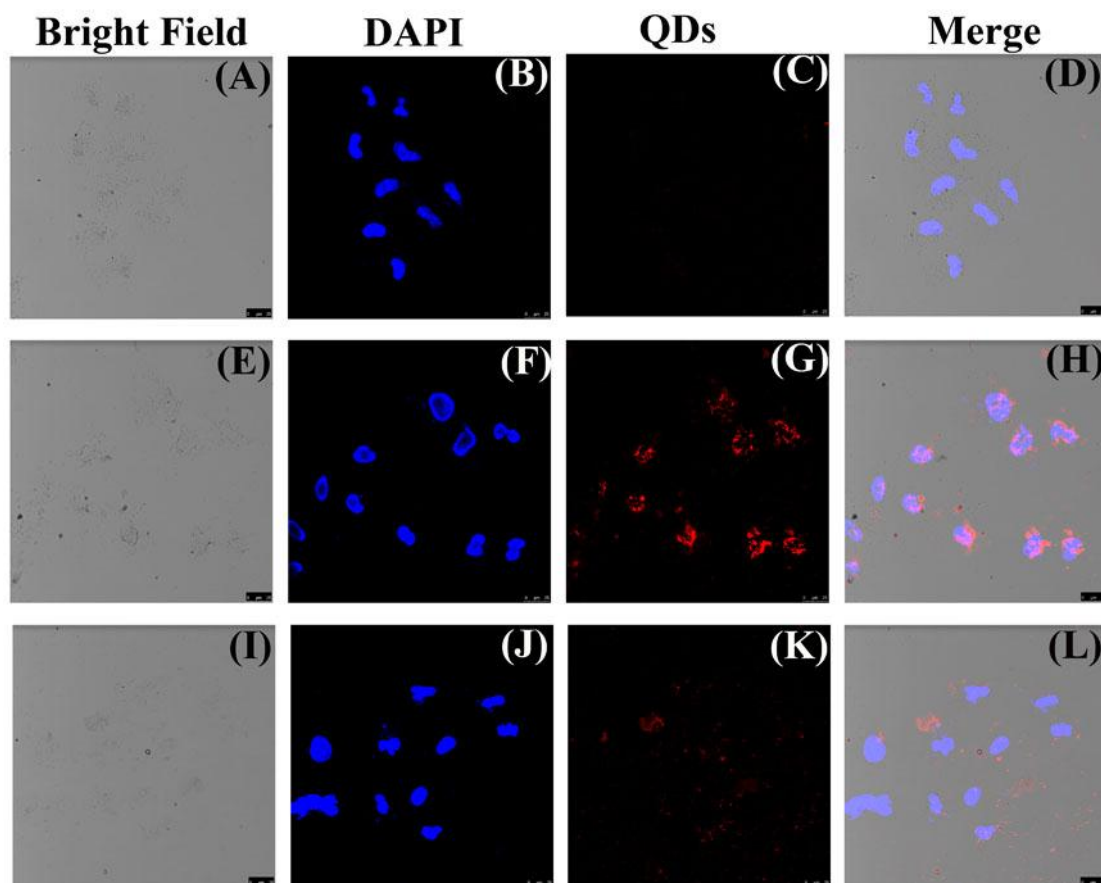

**Figure S2.** CLSM of HeLa cells after incubation with QDs-Con A in the presence of free Con A (A-D), QD-Con A-GlcNAc in the presence of free Con A (E-H) and QD-Con A-GlcNAc in the presence of GlcNAc (I-L) . The scale bar: 25  $\mu$ m.
